# Supplementary material for: Tissue-Specific Vulnerability to Apoptosis in Machado-Joseph Disease
Source: MDPI journal article supplement (doi:10.3390/cells12101404), 2023-05-17
Supplement: s1 [file s1]

Supplementary Table S1. Characterization of the MJD subjects (preclinical subjects and patients) and control individuals used in this study (n=124).

|                                        | Preclinical subjects  | Patients              | Controls                 |
|----------------------------------------|-----------------------|-----------------------|--------------------------|
| <b>Blood samples</b>                   |                       |                       |                          |
| n (Female; Male)                       | 19 (12; 7)            | 37 (19; 18)           | 54 <sup>†</sup> (30; 24) |
| Age <sup>1</sup> , years               | 30.3 ± 7.4 [21; 44]   | 45.9 ± 11.6 [26; 65]  | 41.1 ± 12.7 [21; 67]     |
| CAG <sub>n</sub> allele 1 <sup>2</sup> | 20.0 ± 4.1 [14; 28]   | 20.7 ± 4.9 [14; 29]   | 19.6 ± 4.3 [14; 27]*     |
| CAG <sub>n</sub> allele 2 <sup>3</sup> | 68.1 ± 3.0 [62; 75]   | 71.2 ± 2.8 [64; 76]   | 24.0 ± 4.0 [14; 32]*     |
| Years to onset <sup>4</sup> , years    | -10.5 ± 9.2 [-26; +5] | NA                    | NA                       |
| Age at onset, years                    | NA                    | 35.2 ± 7.9 [22; 52]   | NA                       |
| Disease duration, years                | NA                    | 10.7 ± 8.7 [1; 36]    | NA                       |
| <b>Post-mortem brain samples</b>       |                       |                       |                          |
| n (Female; Male)                       | NA                    | 5 (4; 1)              | 9 (5; 4)                 |
| CAG <sub>n</sub> allele 1 <sup>2</sup> | NA                    | 19.0 ± 4.1 [12; 22]   | 17.0 ± 5.3 [11; 25]      |
| CAG <sub>n</sub> allele 2 <sup>3</sup> | NA                    | 70.2 ± 3.0 [66; 73]   | 22.6 ± 5.6 [12; 30]      |
| Age at onset, years                    | NA                    | 45.0 ± 8.5 [39; 51]** | NA                       |
| Disease duration, years                | NA                    | 26.5 ± 9.2 [20; 33]** | NA                       |
| Age at death, years                    | NA                    | 63.0 ± 16.0 [48; 84]  | 69.6 ± 12.2 [48; 83]     |
| PMI <sup>5</sup> , hours               | NA                    | 26.6 ± 17.2 [4; 48]   | 15.4 ± 8.0 [4; 24]       |

Quantitative variables are displayed as mean ± standard deviation [minimum; maximum]; <sup>1</sup>Age at first blood collection, <sup>2</sup>Number of CAG repeats in the normal allele of MJD subjects/number of CAG repeats in normal allele 1 of controls; <sup>3</sup>Number of CAG repeats in expanded allele of MJD subjects/number of CAG repeats in normal allele 2 of controls; <sup>4</sup>Years to onset: negative values indicate the numbers of years missing to the estimated onset and positive values indicate the number of years that have elapsed the estimated onset; <sup>5</sup>Post-mortem interval; <sup>†</sup>Age (±3 years) and sex-matched paired controls for preclinical subjects and patients (two individuals were used as paired matched controls for both groups); \*Information available for 47 controls; \*\*Information available for two patients; NA, not applicable/not available

Supplementary Table S2. Demographic, genetic, and clinical data of the 18 MJD patients used in the follow-up study.

|                          | Baseline             | Visit 1              | Visit 2              |
|--------------------------|----------------------|----------------------|----------------------|
| n (Female; Male)         | 18 (7; 11)           | 18 (7; 11)           | 11 (4; 7)            |
| Age <sup>1</sup> , years | 48.9 ± 13.7 [26; 65] | 53.9 ± 13.6 [32; 72] | 52.6 ± 13.9 [34; 72] |
| Normal CAG allele        | 19.7 ± 5.1 [14; 29]  | 19.7 ± 5.1 [14; 29]  | 19.6 ± 5.9 [14; 29]  |
| Expanded CAG allele      | 70.9 ± 3.2 [64; 76]  | 70.9 ± 3.2 [64; 76]  | 71.4 ± 3.9 [64; 76]  |
| Age at onset, years      | 36.2 ± 7.9 [22; 50]  | 36.2 ± 7.9 [22; 50]  | 36.1 ± 9.0 [22; 50]  |
| Disease duration, years  | 12.7 ± 9.5 [1; 36]   | 17.7 ± 9.4 [7; 40]   | 16.6 ± 6.7 [9; 27]   |

Quantitative variables are displayed as mean ± standard deviation [minimum; maximum]; <sup>1</sup>Age at first blood collection

Supplementary Table S3. Characterization of post-mortem human brain samples from MJD patients and controls individuals, and RNA integrity number of each brain samples used in this study.

| Health condition | Sex    | ID | Age at death (years) | PMI <sup>1</sup> (hours) | Cause of death                                                                                | Age at onset (years) | CAG repeats         | RNA integrity number |      |                |
|------------------|--------|----|----------------------|--------------------------|-----------------------------------------------------------------------------------------------|----------------------|---------------------|----------------------|------|----------------|
|                  |        |    |                      |                          |                                                                                               |                      | Allele 1   Allele 2 | DCN <sup>2</sup>     | Pons | Frontal cortex |
| Controls         | Female | 1  | 48                   | 5                        | Polycythemia vera, mesenteric thrombosis and ischemic bowel resection                         | NA                   | 12 19               | 3.7                  | 3.2  | 3.1            |
|                  |        | 2  | 76                   | 14                       | Cardiac failure                                                                               | NA                   | 21 25               | 2.9                  | 5.3  | 3.4            |
|                  |        | 3  | 80                   | 19                       | Congestive heart failure and atrial fibrillation                                              | NA                   | 12 18               | 5.2                  | 6    | NA             |
|                  |        | 4  | 83                   | NA                       | Renal cell carcinoma                                                                          | NA                   | 18 21               | 4.8                  | 4.6  | 5.6            |
|                  |        | 5  | 83                   | 21                       | Cardiac arrest, urinary tract infection and sepsis                                            | NA                   | 11 12               | 6.9                  | 5.7  | NA             |
|                  | Male   | 6  | 59                   | 12                       | Sudden cardiac arrest, ventricular fibrillation and post-shock electromechanical dissociation | NA                   | 12 25               | 7.7                  | NA   | 6.5            |
|                  |        | 7  | 61                   | 24                       | Cardiac failure, cardiogenic shock and post-shock electromechanical dissociation              | NA                   | 21 25               | 7.5                  | NA   | 6.9            |
|                  |        | 8  | 65                   | 24                       | Acute respiratory distress syndrome and sepsis                                                | NA                   | 25 28               | NA                   | NA   | NA             |
|                  |        | 9  | 71                   | 4                        | Cardiac failure                                                                               | NA                   | 21 30               | 7                    | 7.4  | 8.3            |
| MJD patients     | Female | 10 | 48                   | 22                       | NA                                                                                            | NA                   | 22 73               | 5.3                  | 4.1  | 6.2            |
|                  |        | 11 | 59                   | 4                        | NA                                                                                            | 39                   | 21 70               | 7.9                  | 6.2  | 8.4            |
|                  |        | 12 | 75                   | 39                       | NA                                                                                            | NA                   | 19 69               | NA                   | NA   | 4              |
|                  |        | 13 | 84                   | 20                       | NA                                                                                            | 51                   | 21 66               | 6.5                  | NA   | 4.7            |
|                  | Male   | 14 | 49                   | 48                       | NA                                                                                            | NA                   | 12 73               | NA                   | 3.5  | 3.9            |

<sup>1</sup>Post-mortem interval; <sup>2</sup>Dentate cerebellar nucleus; NA, not applicable/not available

Supplementary Table S4. Genotypes of the 9 and 18 month-old mice used in this study.

| Age          | Genotype         | Gender | Mouse #         | Mouse Tag | CAG repeats          |
|--------------|------------------|--------|-----------------|-----------|----------------------|
| 9-month-old  | wt <sup>1</sup>  | Female | 1               | 840.0.0   | NA                   |
|              |                  |        | 2               | 840.0.2   |                      |
|              |                  |        | 3               | 817.0.0   |                      |
|              |                  |        | 4               | 817.0.3   |                      |
|              |                  |        | 5               | 843.0.1   |                      |
|              |                  |        | 6 <sup>#</sup>  | 840.0.4   |                      |
|              |                  | Male   | 7               | 842.0.1   | NA                   |
|              |                  |        | 8               | 845.0.1   |                      |
|              |                  |        | 9               | 845.0.2   |                      |
|              |                  |        | 10              | 839.0.2   |                      |
|              |                  |        | 11*             | 846.0.2   |                      |
|              |                  |        | 12*             | 855.0.0   |                      |
|              | Q84 <sup>2</sup> | Female | 13              | 817.0.1   | 73/74/ <b>76</b> /83 |
|              |                  |        | 14              | 817.0.2   | <b>73</b> /76/79/88  |
|              |                  |        | 15              | 840.0.1   | <b>72</b> /75/84     |
|              |                  |        | 16              | 817.0.4   | 68/ <b>73</b> /80/83 |
|              |                  |        | 17              | 843.0.0   | 68/ <b>73</b> /79/82 |
|              |                  |        | 18              | 843.0.3   | <b>71</b> /75/78/85  |
|              |                  | Male   | 19              | 813.0.0   | 68/ <b>73</b> /77/82 |
|              |                  |        | 20              | 813.0.1   | 68/ <b>73</b> /77/83 |
|              |                  |        | 21              | 842.0.2   | <b>71</b> /75/81     |
|              |                  |        | 22              | 845.0.0   | <b>72</b> /76/86     |
|              |                  |        | 23*             | 845.0.3   | <b>72</b> /77/85     |
|              |                  |        | 24 <sup>#</sup> | 842.0.0   | NA                   |
| 18-month-old | wt <sup>1</sup>  | Female | 25              | 61.0.0    | NA                   |
|              |                  |        | 26              | 61.0.1    |                      |
|              |                  |        | 27              | 691.0.3   |                      |
|              |                  |        | 28              | 702.0.0   |                      |
|              |                  |        | 29              | 702.0.1   |                      |
|              |                  |        | 30              | 61.0. 4   |                      |
|              | Q84 <sup>2</sup> |        | 31              | 691.0.1   | NA                   |
|              |                  |        | 32*             | 702.0.2   |                      |
|              |                  |        | 33              | 710.0.3   |                      |

<sup>1</sup>wild type littermate mice; <sup>2</sup>hemizygous YACMJD84.2 transgenic mice; <sup>#</sup>Protein sample not available; \*RNA sample not available; NA, not available; the main CAG allele is indicated in bold

Supplementary Table S5. Correlations between transcript levels of *BCL2*, *BAX* and *TP53*, as well as *BCL2/BAX* ratio and demographic, genetic and clinical data of MJD subjects (preclinical individuals and patients).

|                     |                | Age <sup>1</sup> | CAG-E <sup>2</sup> | Years to onset | Age at onset |                  | DD <sup>3</sup> |                       |
|---------------------|----------------|------------------|--------------------|----------------|--------------|------------------|-----------------|-----------------------|
|                     |                |                  |                    |                | CAG-E adj.   | Age + CAG-E adj. | No adj.         | Age <sup>1</sup> adj. |
| Preclinical subject |                |                  |                    |                |              |                  |                 |                       |
| BCL2                | Rho            | 0.269            | 0.292              | -0.275         |              |                  |                 |                       |
|                     | Sig (2-tailed) | 0.266            | 0.225              | 0.255          | NA           | NA               | NA              | NA                    |
| BAX                 | Rho            | -0.001           | 0.052              | 0.002          |              |                  |                 |                       |
|                     | Sig (2-tailed) | 0.997            | 0.832              | 0.994          | NA           | NA               | NA              | NA                    |
| TP53                | Rho            | -0.090           | 0.078              | 0.101          |              |                  |                 |                       |
|                     | Sig (2-tailed) | 0.715            | 0.751              | 0.681          | NA           | NA               | NA              | NA                    |
| BCL2/BAX            | Rho            | 0.005            | 0.217              | 0.093          |              |                  |                 |                       |
|                     | Sig (2-tailed) | 0.985            | 0.403              | 0.722          | NA           | NA               | NA              | NA                    |
| Patient             |                |                  |                    |                |              |                  |                 |                       |
| BCL2                | Rho            | -0.264           | 0.268              | NA             | 0.011        |                  | 0.229           |                       |
|                     | Sig (2-tailed) | 0.114            | 0.109              |                | 0.951        | NA               | 0.173           | NA                    |
| BAX                 | Rho            | -0.350           | 0.273              | NA             | -0.522       | -0.482           | 0.048           | 0.308                 |
|                     | Sig (2-tailed) | <b>0.034</b>     | 0.102              |                | <b>0.001</b> | <b>0.003</b>     | 0.777           | 0.067                 |
| TP53                | Rho            | -0.360           | 0.295              | NA             | -0.189       | -0.106           | 0.198           | 0.090                 |
|                     | Sig (2-tailed) | <b>0.029</b>     | 0.076              |                | 0.270        | 0.544            | 0.240           | 0.600                 |
| BCL2/BAX            | Rho            | 0.243            | -0.222             | NA             | 0.403        | 0.393            | 0.014           | 0.279                 |
|                     | Sig (2-tailed) | 0.153            | 0.194              |                | <b>0.016</b> | <b>0.022</b>     | 0.933           | 0.105                 |

<sup>1</sup>Age at first blood collection; <sup>2</sup>CAG-E: expanded CAG repeat; <sup>3</sup>Disease duration

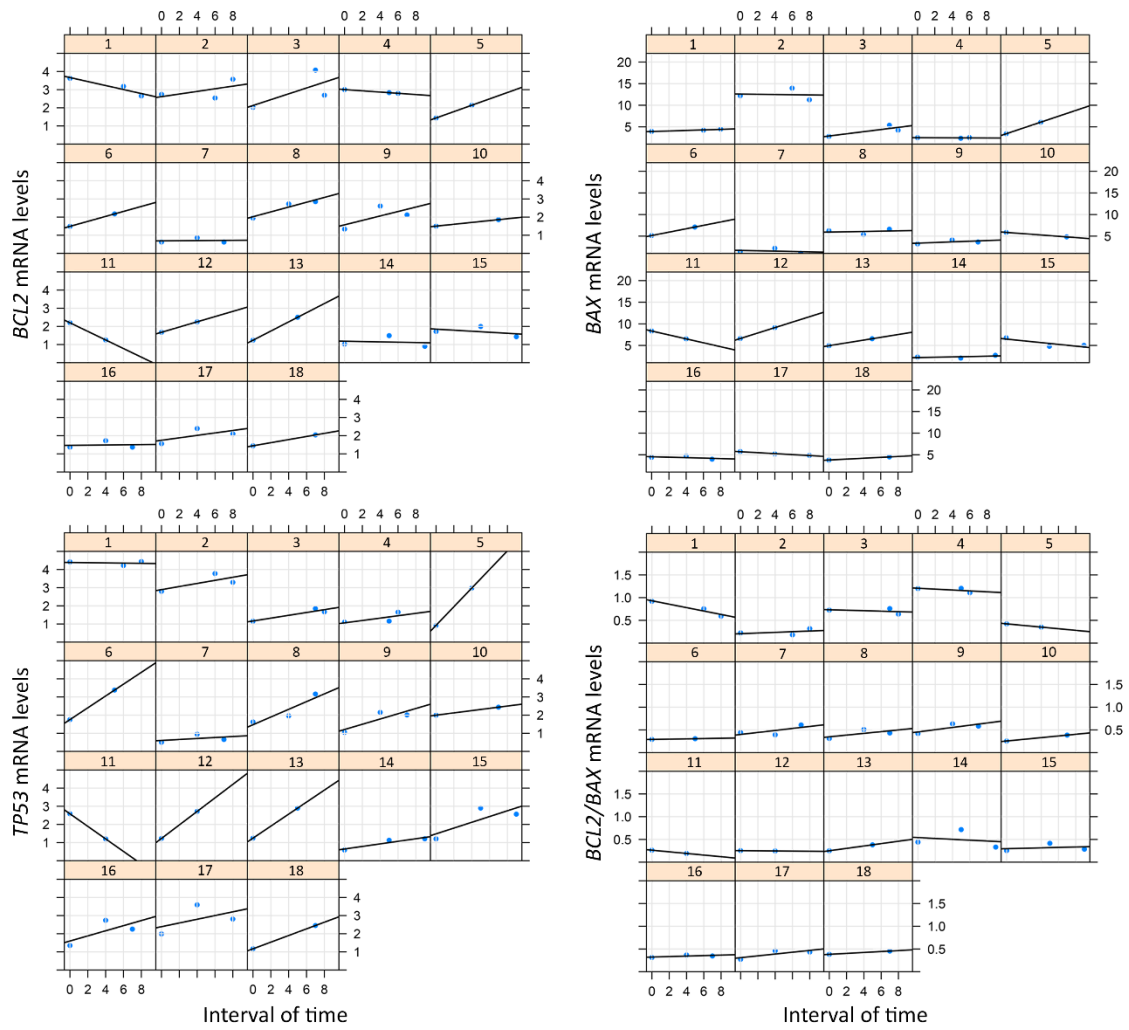

Supplementary Figure S1. *BCL2*, *BAX* and *TP53* transcriptional levels and *BCL2/BAX* ratio changes over time in the 18 patients analyzed in the follow-up study.

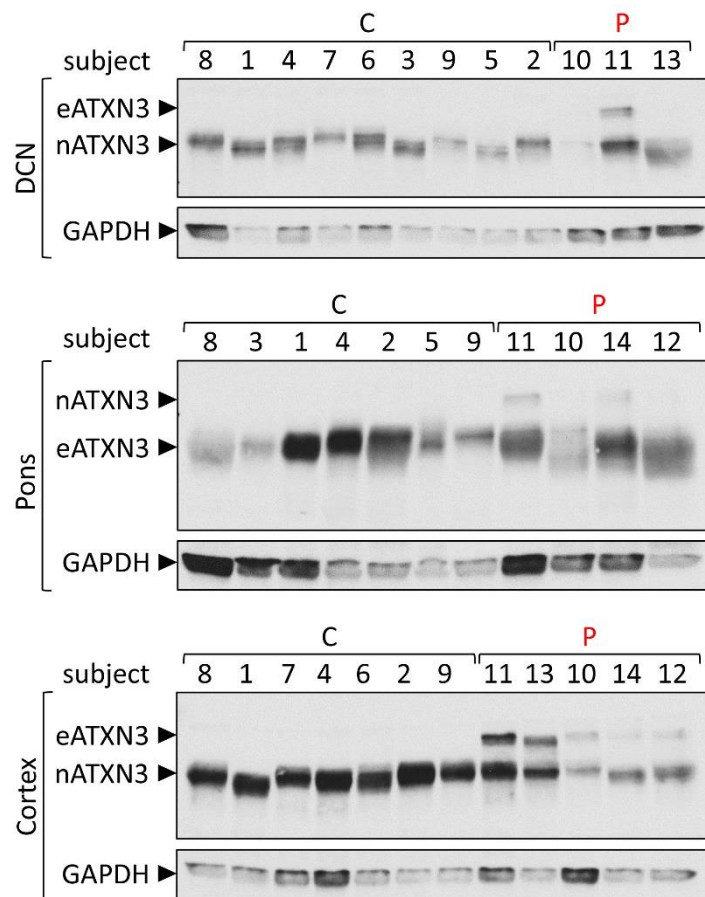

Supplementary Figure S2. Western blot using the anti-ATXN3 antibody (1H9) to detect the native human ATXN3 (nATXN3) and expanded human ATXN3 (eATXN3) in insoluble protein fraction of post-mortem human samples from dentate cerebellar nucleus (DCN), pons and frontal cortex (Cortex) of Machado-Joseph disease patients (P) and control subjects (C). GAPDH was used as a protein loading control.

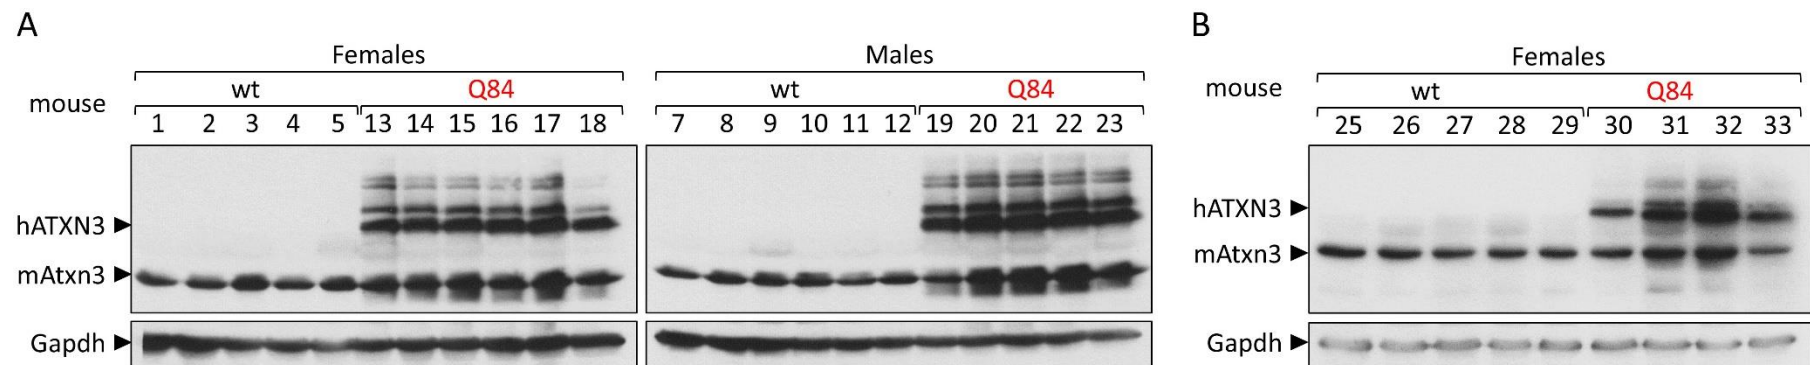

Supplementary Figure S3. Western blot using the anti-ATXN3 antibody (1H9) to detect the mutant human ATXN3 (hATXN3) and endogenous mouse ATXN3 (eATXN3) in soluble fraction protein from (A) cerebral cortex of 9 months-old and (B) 18 months-old hemizygous YACMJD84.2 (Q84) transgenic and wild-type (wt) littermate mice. GAPDH was used as a protein loading control.
